# Supplementary material for: Adenovirus vector-mediated single chain variable fragments target the nucleocapsid protein of porcine epidemic diarrhea virus and protect against viral infection in piglets
Source: PubMed Central journal article supplement (PMC9902916; doi:10.3389/fimmu.2023.1058327), 2023-01-24
Supplement: Image_1.pdf [file Image_1.pdf]

## *Supplementary Material*

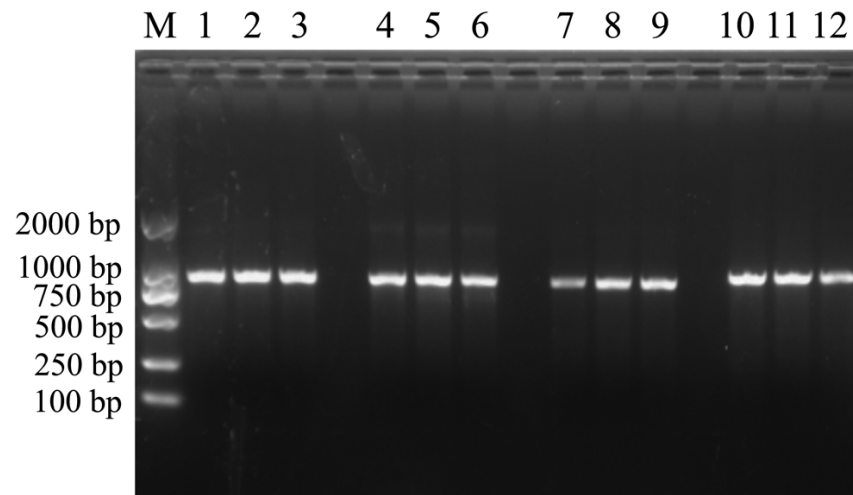

**Supplementary Figure 1.** PCR amplification of the four scFv genes. Lane M, 2,000-bp DNA ladder; lanes 1-3, PCR product of ZW1-16 gene; lanes 4-6, PCR product of ZW3-21 gene; lanes 7-9, PCR product of ZW1-41 gene; lanes 10-12, PCR product of ZW4-16 gene.

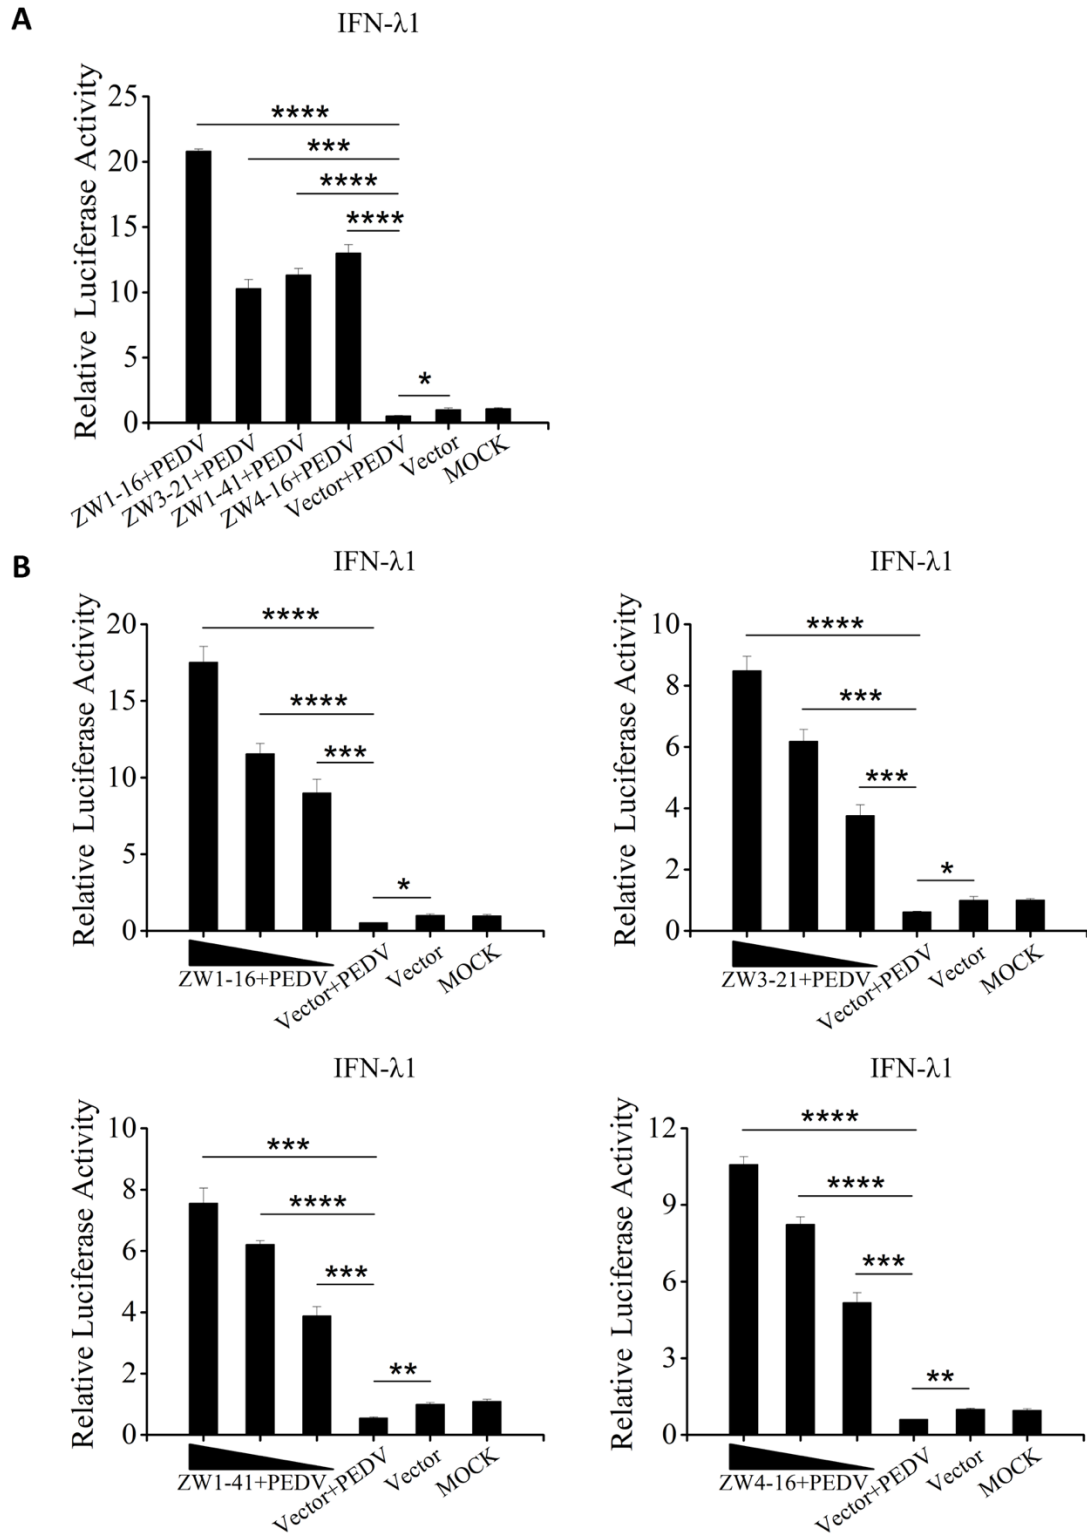

**Supplementary Figure 2.** Effect of the scFvs against PEDV N protein on promoter activation of IFN- $\lambda$ 1. **A)** IPEC-J2 cells were cotransfected with 1.2  $\mu$ g of recombinant plasmid pCMV-HA-ZW1-16, pCMV-HA-ZW3-21, pCMV-HA-ZW1-41, pCMV-HA-ZW4-16, or pCMV-HA, 0.4  $\mu$ g of recombinant plasmid pGL3-Basic-IFN- $\lambda$ 1-P containing IFN- $\lambda$ 1 promoter together with 0.04  $\mu$ g of the plasmid pRL-

TK. **B)** Analysis of IFN- $\lambda$ 1 promoter activities under different concentrations (1.2, 0.8, or 0.4 $\mu$ g) of pCMV-HA-ZW1-16, pCMV-HA-ZW3-21, pCMV-HA-ZW1-41 and pCMV-HA-ZW4-16, respectively. The cells were infected with PEDV at 24 hpt. Luciferase assays were performed at 12 hpi. Untransfected uninfected IPEC-J2 cells were used as the MOCK control. The relative firefly luciferase activity was normalized to the *Renilla reniformis* luciferase activity, and the untreated empty vector control value was set to 1. Values are the means  $\pm$  standard errors of the means (mean  $\pm$  SEM) of three independent experiments. \*  $p < 0.05$ , \*\*  $p < 0.01$ , \*\*\*  $p < 0.001$ , \*\*\*\*  $p < 0.0001$ .
